# Supplementary material for: Multi-interfacial plasmon coupling in multigap (Au/AgAu)@CdS core–shell hybrids for efficient photocatalytic hydrogen generation
Source: Royal Society of Chemistry journal article supplement (doi:10.1039/c9nr09696e), 2020-01-01
Supplement: c9nr09696e1.pdf [file c9nr09696e1.pdf]

## Supporting Information

### Multi-interfacial Plasmon Coupling in Multigap (Au/AgAu)@CdS Core-Shell Hybrids for Efficient Photocatalytic Hydrogen Generation

*Liang Ma<sup>a \*</sup>, You-Long Chen<sup>a</sup>, Da-Jie Yang<sup>b \*</sup>, Hai-Xia Li<sup>a</sup>, Si-Jing Ding<sup>c \*</sup>, Lun Xiong<sup>a</sup>,  
Ping-Li Qin<sup>a</sup>, Xiang-Bai Chen<sup>a \*</sup>*

<sup>a</sup> Hubei Key Laboratory of Optical Information and Pattern Recognition, Wuhan Institute of Technology, Wuhan, 430205, P. R. China.

<sup>b</sup> Beijing Computational Science Research Center, Beijing, 100193, P. R. China.

<sup>c</sup> School of Mathematics and Physics, China University of Geosciences (Wuhan), 430074, Wuhan, P. R. China.

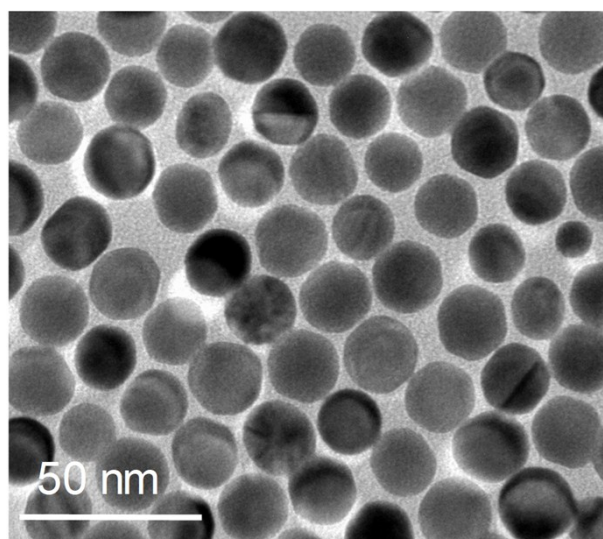

**Figure S1.** TEM image of Au nanospheres.

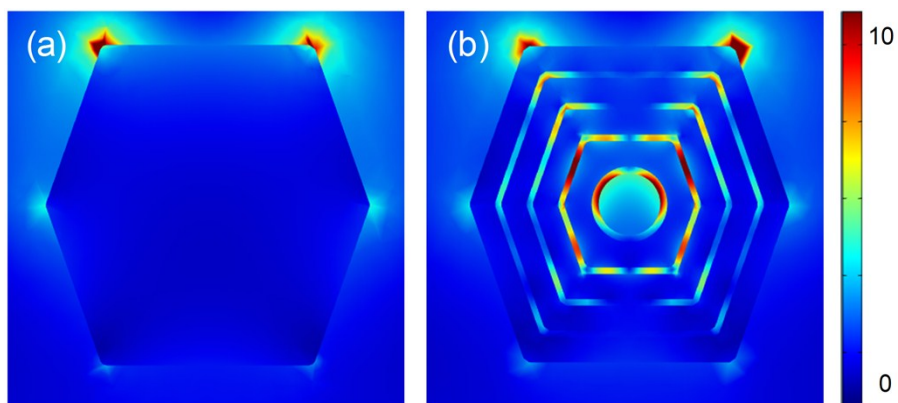

**Figure S2.** Calculated electric field distribution of same-sized solid Au/Ag (a) and four-gap Au/AgAu (b) hybrid.

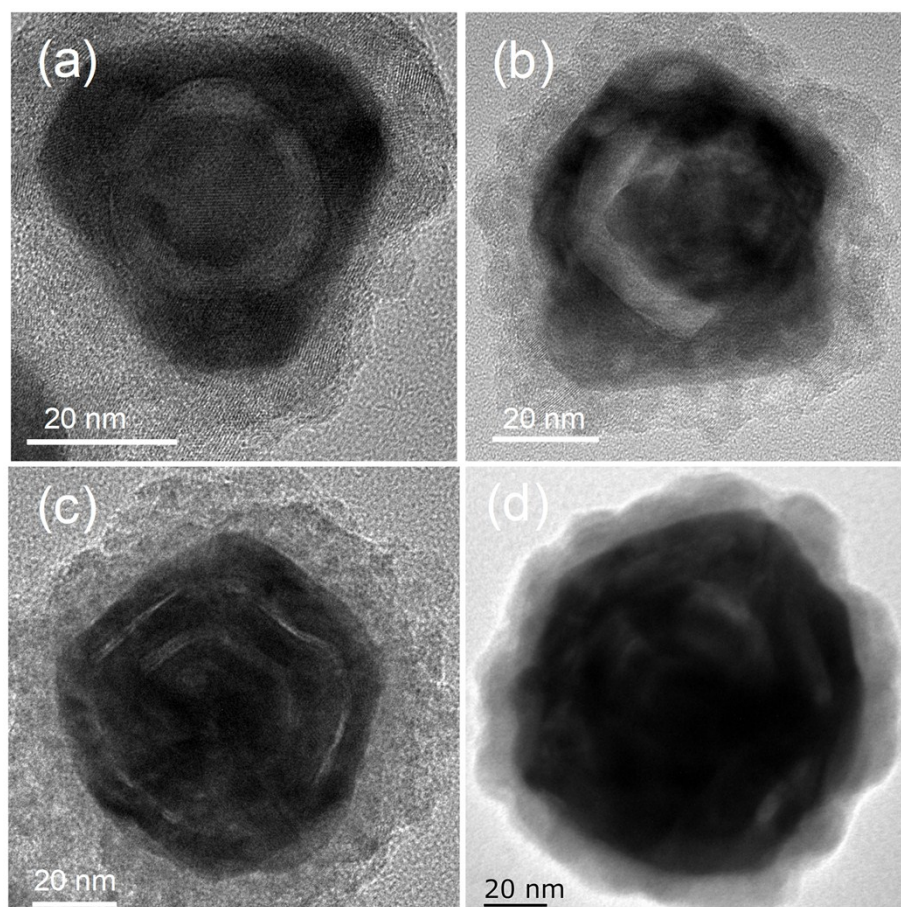

**Figure S3.** TEM images of single one- (a), two- (b), three- (c), and four-gap (d) (Au/AgAu)@CdS core-shell hybrids.

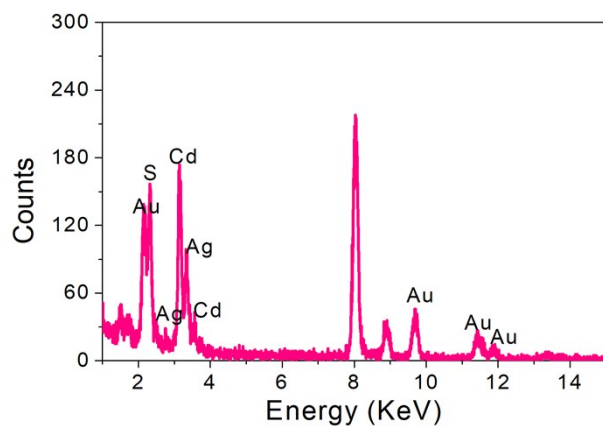

**Figure S4.** EDS spectrum of four-gap (Au/AgAu)@CdS core-shell hybrids. The elements of Au, Ag, Cd, and S are both observed.

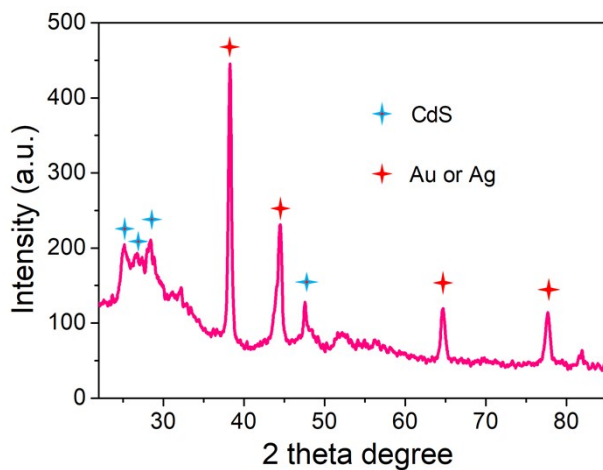

**Figure S5.** XRD pattern of four-gap (Au/AgAu)@CdS hybrids. The diffraction peaks (labeled with blue star) located at 24.8°, 26.4°, 28.2°, and 47.7° can be ascribed to (100), (002), (101), and (103) planes of hexagonal wurtzite CdS (PDF#41-1049). The XRD patterns of Au and Ag almost locate in the same scattering angles and could not be distinguished. The characteristic peaks (labeled with red star) at 38.3°, 44.4°, 64.2°, and 77.5° both can be assigned to the (111), (200), (220), and (311) planes of Au (PDF#04-0784) and Ag (PDF#04-0783).

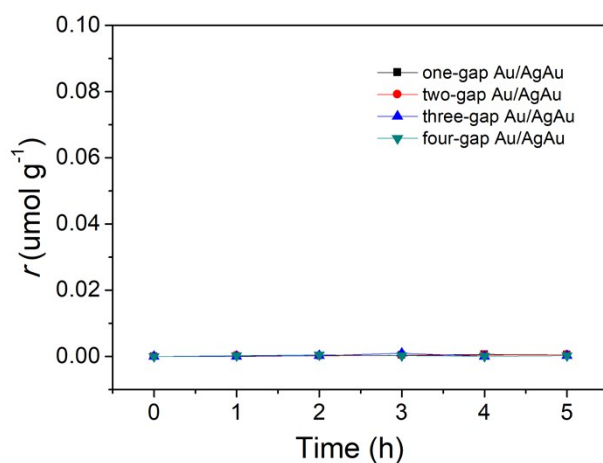

**Figure S6.** Photocatalytic hydrogen generation for one-, two-, three-, and four-gap Au/AgAu cores.

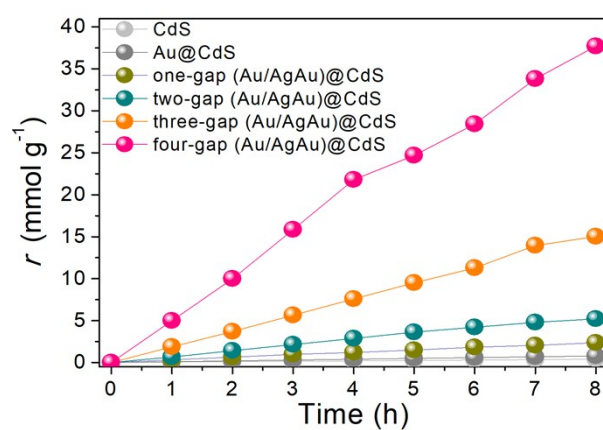

**Figure S7.** Photocatalytic hydrogen generation for CdS, Au@CdS, one-, two-, three-, and four-gap (Au/AgAu)@CdS hybrids.

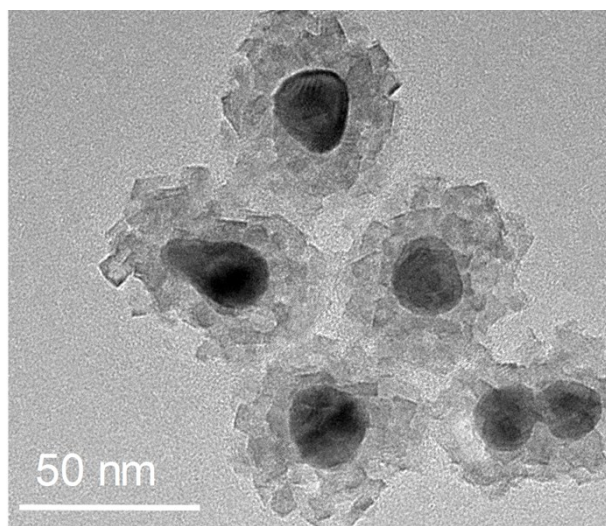

**Figure S8.** TEM image of Au@CdS core-shell hybrids.

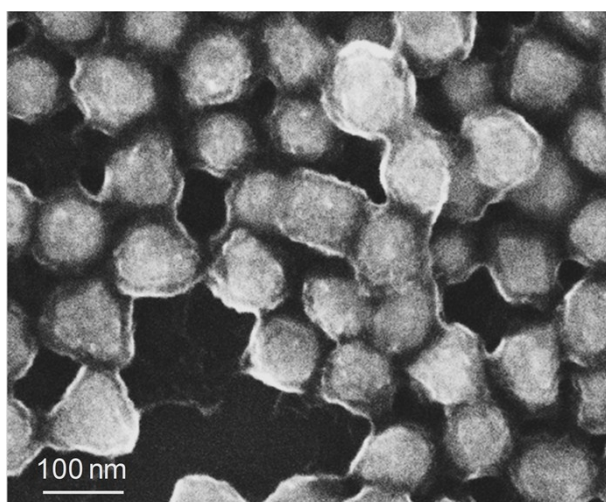

**Figure S9.** SEM image of four-gap (Au/AgAu)@CdS hybrids after 24 hrs of reaction.
